# Supplementary material for: Polymorphic transformation towards formation of nanotubes by self-assembly of an achiral molecule
Source: Royal Society of Chemistry journal article supplement (doi:10.1039/c5nr05790f), 2015-01-01
Supplement: c5nr05790f1.pdf [file c5nr05790f1.pdf]

## Supporting information

### Polymorphic transformation towards formation of nanotubes by self-assembly of an achiral molecule

Shuai Wang, Yajun Zhang, Yijun Xia, Bo Song\*

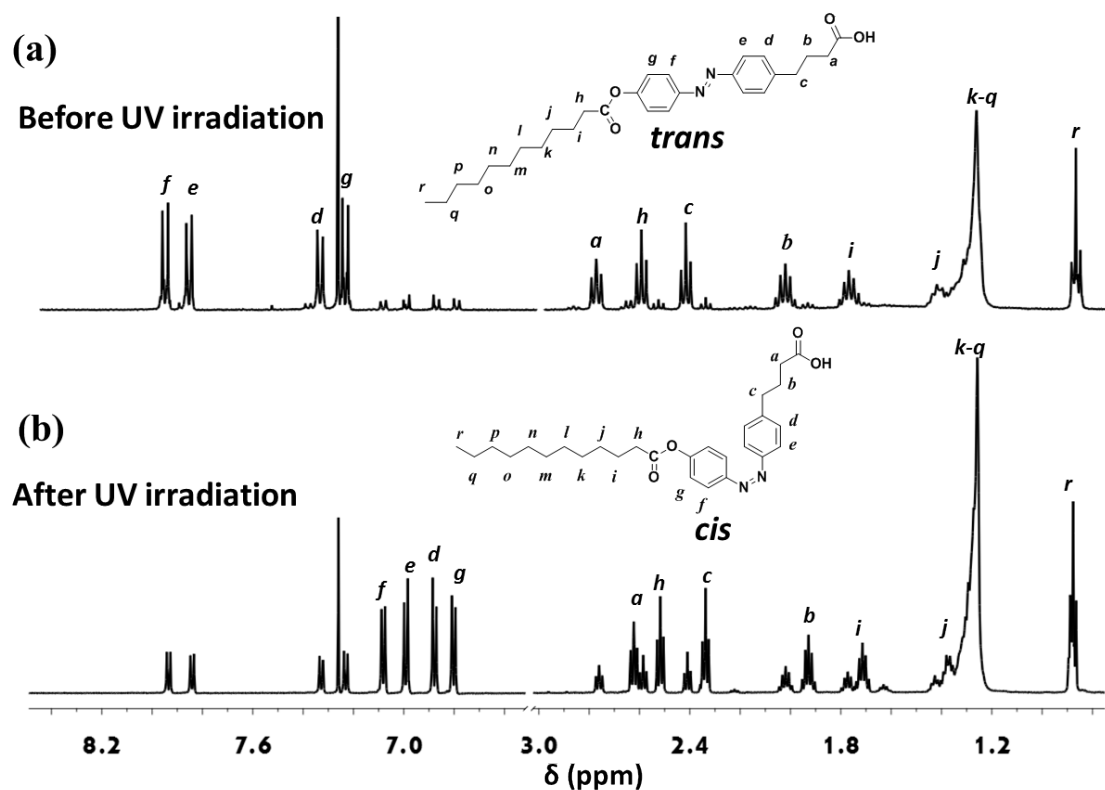

**Fig. S1**  $^1\text{H}$  NMR spectra of ABA11 (a) before and (b) after 5 min of UV irradiation ( $365\text{ nm}$ ,  $100\text{ mW cm}^{-2}$ ) in  $\text{CDCl}_3$ .

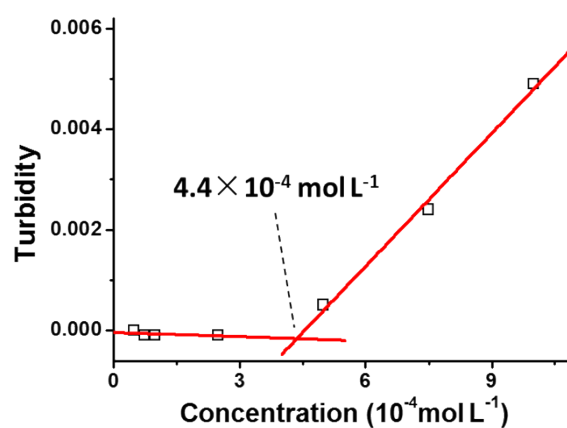

**Fig. S2** Plot of the turbidity at  $600\text{ nm}$  versus the concentration of the ABA11 in DMSO. The DMSO solutions were kept at  $80\text{ }^\circ\text{C}$  for  $0.5\text{ h}$ , and then cooled to room temperature with speed of  $0.2\text{ }^\circ\text{C min}^{-1}$ .

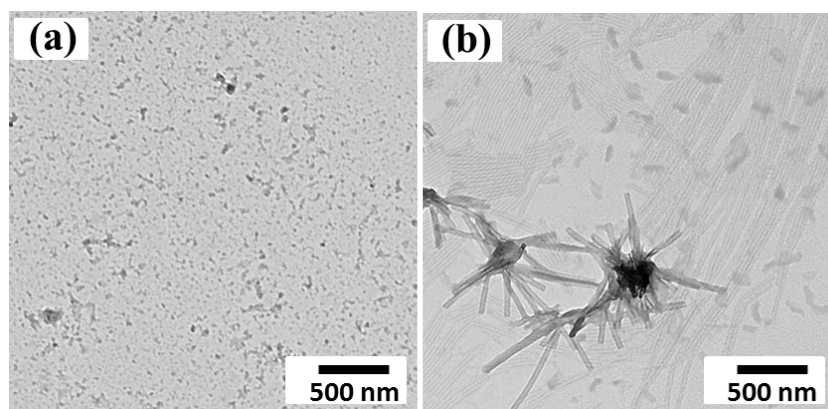

**Fig. S3** TEM images of the assemblies formed by ABA11 in DMSO with different concentrations: (a)  $1 \times 10^{-4} \text{ mol L}^{-1}$ , (b)  $5 \times 10^{-4} \text{ mol L}^{-1}$ .
